# Supplementary material for: Perspectives on surgical treatment for thymic epithelial tumors: a narrative review
Source: PubMed Central journal article supplement — Gland Surg. 2024 Feb 20;13(2):225–35. doi: 10.21037/gs-23-453 (PMC10915418; doi:10.21037/gs-23-453), 2024-02-20
Supplement: gs-13-02-225-rc.pdf [file gs-13-02-225-rc.pdf]

## Narrative Review Checklist

| Section/Topic             | Item No | Item                                                                                                                                                                               | Reported on Page Number/Line Number | Reported on Section/Paragraph                       |
|---------------------------|---------|------------------------------------------------------------------------------------------------------------------------------------------------------------------------------------|-------------------------------------|-----------------------------------------------------|
| <b>TITLE</b>              |         |                                                                                                                                                                                    |                                     |                                                     |
| Title                     | 1       | Identify the report as a Narrative Review or Literature Review.                                                                                                                    | Page 1/Line 1                       | Section 1/Paragraph 1                               |
| <b>ABSTRACT</b>           |         |                                                                                                                                                                                    |                                     |                                                     |
| Structured summary        | 2       | Provide a structured summary with the subsections as: Background and Objective, Methods, Key Content and Findings, Conclusions.                                                    | Page 2-3/Line 20-43                 | Section 2/Paragraph 1-4                             |
| <b>INTRODUCTION</b>       |         |                                                                                                                                                                                    |                                     |                                                     |
| Rationale/background      | 3       | Describe the rationale for the review in the context of what is already known.                                                                                                     | Page 4/Line 52-64                   | Section 3/Paragraph 1                               |
| Objectives                | 4       | Specify the key question(s) identified for the review topic.                                                                                                                       | Page 5/Line 91-94                   | Section 3/Paragraph 7                               |
| <b>METHODS</b>            |         |                                                                                                                                                                                    |                                     |                                                     |
| Research selection        | 5       | Specify the process for identifying the literature search (eg, years considered, language, publication status, study design, and databases of coverage).                           | Page 6/Line 96-103                  | Section 4/Paragraph 1                               |
| <b>DISCUSSION/SUMMARY</b> |         |                                                                                                                                                                                    |                                     |                                                     |
| Narrative                 | 6       | Discuss: 1) research reviewed including fundamental or key findings, 2) limitations and/or quality of research reviewed, and 3) need for future research.                          | Page 11-12/Line 218-245             | Section 9/Paragraph 5-7<br>Section 10/Paragraph 1-3 |
| Summary                   | 7       | Provide an overall interpretation of the narrative review in the context of clinical practice for health professionals, policy development and implementation, or future research. | Page 12-13/Line 247-254             | Section 11/Paragraph 1-2                            |

Article information: <https://dx.doi.org/10.21037/gs-23-453>

\*As the checklist was provided upon initial submission, the page number/line number reported may be changed due to copy editing and may not be referable in the published version. In this case, the section/paragraph may be used as an alternative reference.
